# Supplementary material for: Inducible T-cell co-stimulator ligand (ICOSL) blockade leads to selective inhibition of anti-KLH IgG responses in subjects with systemic lupus erythematosus
Source: PubMed Central journal article supplement — Lupus Sci Med. 2016 Apr 8;3(1):e000146. doi: 10.1136/lupus-2016-000146 (PMC4836284; doi:10.1136/lupus-2016-000146), 2016-04-08
Supplement: lupus-2016-000146supp.pdf [file lupus-2016-000146supp.pdf]

## APPENDIX

### Appendix A. Ethics Approval Bodies, listed by Study – 20060132 (Phase 1a), 20060169 (Phase 1b)

| Study    | Site Name                                      | IRB/IEC Name                                                                                             | IRB/IEC Address                                                                            |
|----------|------------------------------------------------|----------------------------------------------------------------------------------------------------------|--------------------------------------------------------------------------------------------|
| 20060132 | Altoona Center for Clinical Research           | Liberty IRB, Inc. (Site Central IRB/IEC)                                                                 | 2024 Larchmont Drive, Deland, FL, 32724, USA                                               |
| 20060132 | Covance Clinical Research Unit - Dallas        | BRANY - Biomedical Research Alliance of New York LLC (Site Central IRB/IEC)                              | 225 Community Drive, Suite 100, Great Neck, NY, 11021, USA                                 |
| 20060132 | CSMC, Clinical & Translational Research Center | CSMC Institutional Review Board (Local IRB)                                                              | 8383 Wilshire Blvd., Suite 742, Beverly Hills, CA 90211, USA                               |
| 20060132 | Dedicated Phase I                              | Independent Investigational Review Board Inc (Site Central IRB/IEC)                                      | 6738 West Sunrise Blvd, Plantation, FL 33313, USA                                          |
| 20060132 | Feinstein Institute for Medical Research       | BRANY - Biomedical Research Alliance of New York LLC (Site Central IRB/IEC)                              | 225 Community Drive, Suite 100, Great Neck, NY, 11021, USA                                 |
| 20060132 | Hammersmith Medicines Research                 | National Research Ethics Service - Hammersmith and Queen Charlotte's & Chelsea Research Ethics Committee | Room 4W/12, 4th Floor, Charing Cross Hospital, Fulham Palace Road, London, W6 8RF, England |
| 20060132 | Metroplex Clinical Research Center             | Liberty IRB, Inc.                                                                                        | 2024 Larchmont Drive, Deland, FL, 32724, USA                                               |
| 20060132 | Pinnacle Research Group, LLC                   | Liberty IRB, Inc. (Site Local IRB/IEC)                                                                   | 2024 Larchmont Drive, Deland, FL, 32724, USA                                               |
| 20060132 | Symbio Clinical Research Center                | Western Institutional Review Board                                                                       | 3535 Seventh Avenue South West, Olympia, WA, 98502, USA                                    |
| 20060132 | University of Rochester R John Looney MD       | Western Institutional Review Board (Site Central IRB/IEC)                                                | 3535 Seventh Avenue South West, Olympia, WA, 98502, USA                                    |
|          |                                                |                                                                                                          |                                                                                            |
| 20060169 | Altoona Center for Clinical Research           | Liberty IRB Inc                                                                                          | 1450 South Woodland Boulevard, Suite 300A, Deland, FL, 32720, USA                          |
| 20060169 | Amarillo Center for Clinical Research          | Chesapeake IRB                                                                                           | 6940 Columbia Gateway Drive, Suite 110, Columbia, MD, 21046, USA                           |
| 20060169 | Danbury Office of Physician Services PC        | Danbury Hospital Institutional Review Board                                                              | 24 Hospital Avenue, Danbury, CT, 06810, USA                                                |
| 20060169 | Dedicated Phase I                              | Liberty IRB Inc                                                                                          | 1450 South Woodland Boulevard, Suite 300A, Deland, FL, 32720, USA                          |
| 20060169 | East Bay Rheumatology Medical Group            | Western Institutional Review Board                                                                       | 1019 39th Avenue Southeast, Suite 120, Puyallup, WA, 98374, USA                            |
| 20060169 | Metroplex Clinical Research Center             | Liberty IRB Inc                                                                                          | 1450 South Woodland Boulevard, Suite 300A, Deland, FL, 32720, USA                          |
| 20060169 | Miami Research Associates                      | Copernicus Group IRB                                                                                     | One Triangle Drive, Suite 100, Durham, NC, 27713, USA                                      |
| 20060169 | Pinnacle Research Group LLC                    | Liberty IRB Inc                                                                                          | 1450 South Woodland Boulevard, Suite 300A, Deland, FL, 32720, USA                          |
| 20060169 | Saint Anthony Memorial                         | Western Institutional Review Board                                                                       | 1019 39th Avenue Southeast, Suite 120, Puyallup, WA, 98374, USA                            |
| 20060169 | The Arthritis Program Research Group           | Research Review Board, Inc.                                                                              | 13085 Yonge Street, Unit 19, Suite 203, Richmond Hill, ON, L4E 0K2, Canada                 |
| 20060169 | The Feinstein Institute for Medical Research   | BRANY - Biomedical Research Alliance of New York LLC                                                     | 225 Community Drive, Suite 100, Great Neck, NY, 11021, USA                                 |
| 20060169 | University of Rochester Medical Center         | Western Institutional Review Board                                                                       | 1019 39th Avenue Southeast, Suite 120, Puyallup, WA, 98374, USA                            |
